# Supplementary material for: Development of Resistance to Endoplasmic Reticulum Stress-Inducing Agents in Mouse Leukemic L1210 Cells
Source: PubMed Central journal article supplement (PMC7321222; doi:10.3390/molecules25112517), 2020-05-28
Supplement: molecules-25-02517-s001.pdf [file molecules-25-02517-s001.pdf]

1 *Supplementary files.*

## 2 **Development of resistance to endoplasmic reticulum** 3 **stress-inducing agents in mouse leukemic L1210 cells.**

4 **Martin Cagala**<sup>1</sup>, **Lucia Pavlikova**<sup>1</sup>, **Mario Seres**<sup>1</sup>, **Karolina Kadlecikova**<sup>2</sup>, **Albert Breier**<sup>1,2,\*</sup>, and  
5 **Zdena Sulova**<sup>1,\*</sup>

6 <sup>1</sup> Institute of Molecular Physiology and Genetics, Centre of Biosciences, Slovak Academy of Sciences,  
7 Dúbravská cesta 9, 84505 Bratislava, Slovakia

8 <sup>2</sup> Institute of Biochemistry and Microbiology, Faculty of Chemical and Food Technology, Slovak University  
9 of Technology in Bratislava, Radlinského 9, 81237 Bratislava, Slovakia

### 10 **S1. Time course of L1210 cell variant proliferation.**

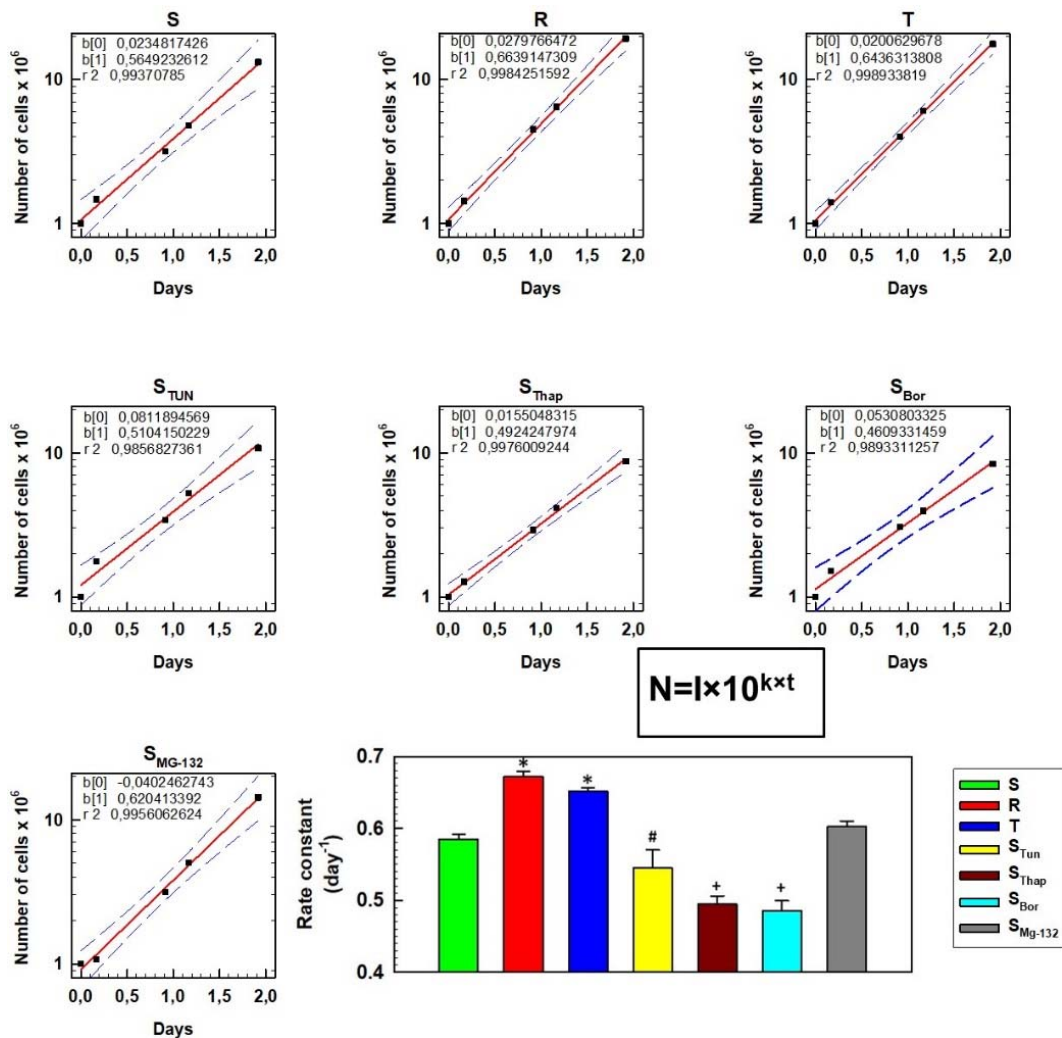

11

12 **Figure S1.** Kinetics of L1210 cell variant proliferation. The time courses of proliferation can be  
13 described by first-order kinetics for each cell variant and therefore gave a straight line in the  
14 semilogarithmic plot. Each point represents the average of 6 independent values, which were all used  
15 for correlation. Red solid line: regression line; blue dashed line: 95% confidence interval valid for 28  
16 degrees of freedom. First-order rate constants (documented on the bar graph) were obtained by

17 nonlinear regression using the attached equation, where N is the number of cells at time T, and I is  
 18 the number of cells in the inoculum. The rate constants are expressed as the calculated value  $\pm$  SD.

19 **S2. Time course of proteasomal activity in variants of L1210 cells.**

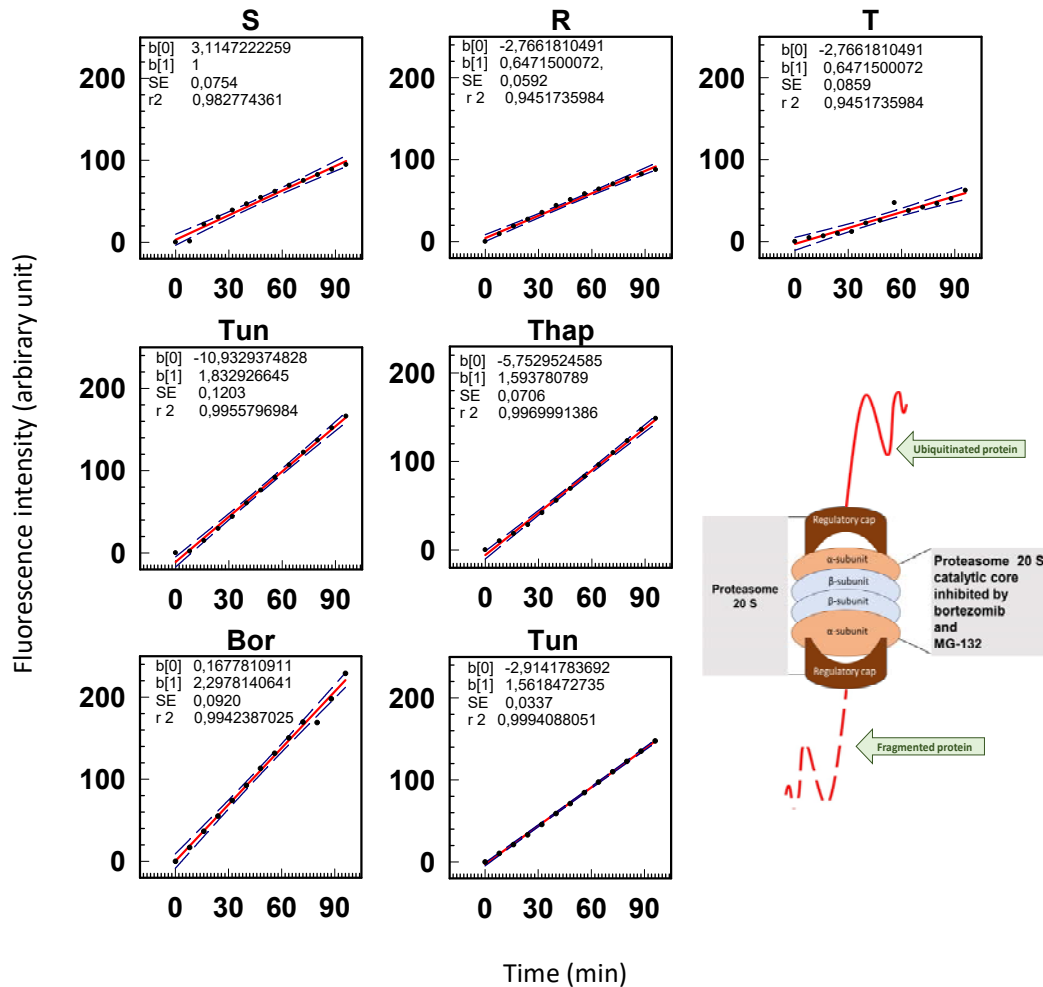

20

21 **Figure S2.** Time course of Suc-LLVY-AMC cleavage by the proteasome. The time courses can be  
 22 described by zero-order kinetics, which is typical for enzyme reactions, for each cell variant and  
 23 therefore gave straight lines in the graphs. The graphs are representative of three independent  
 24 measurements. Red solid line: regression line; blue dashed line: 95% confidence interval valid for 11  
 25 degrees of freedom. The initial velocities of Suc-LLVY-AMC cleavage by the proteasome were  
 26 obtained as the slope of the respective time course. The function of the proteasome and site where its  
 27 inhibitors act are shown in the attached scheme.

28 **S3. Expression of Serca-2 and Serca-3 genes in variants of L1210 cells**

29 **S3.1. RT-PCR detection of Serca2 and Serca3 expression**

30 Isolation of total RNA and reverse transcription were performed with the same protocol as described  
 31 in chapter 4.5.

32 PCR was performed in a 25  $\mu$ l total volume containing 12,5  $\mu$ l of 2x Taq green MasterMix, 10,5  $\mu$ l of  
 33 DNase-free water, 0,5  $\mu$ l of 5  $\mu$ M forward primer and 0,5  $\mu$ l of 5  $\mu$ M reverse primer. After treating the samples

34 at 94°C for 3 min to inactivate the reverse transcriptase, the samples were subjected to 30 cycles of 95°C for 30 s  
 35 followed by 57 - 60°C for 30 s, depending on the primer used, and an incubation at 72°C for 90 s, and a final  
 36 extension at 72°C for 10 min. The PCR products were separated in a 1.5% agarose gel (Lonza Group Ltd, Basel  
 37 Switzerland) and visualized using GelRed™ nucleic acid gel stain (Thermo Scientific). Stained gels were  
 38 imaged using an Amersham™ Imager 600 (GE Healthcare Bio-Science), and gel band quantification was  
 39 processed by densitometry using Image Amersham™ software (GE Healthcare). The data were normalized to  
 40  $\beta$ -actin mRNA and are expressed as the mean  $\pm$  S.D. of three independent measurements.

41 Structure of primers.

| Gene          | Gene alias     |         | Primers                     | bp  |
|---------------|----------------|---------|-----------------------------|-----|
| <i>Atp2a2</i> | <i>Serca2</i>  | Forward | 5'-CCAATGACAATGGCACTTTCT-3' | 395 |
|               |                | Reverse | 5'-GGGCTGGTAGATGTGTTGCT-3'  |     |
| <i>Atp2a3</i> | <i>Serca3</i>  | Forward | 5'-CGTATGGCACGTAAGAATGC-3'  | 190 |
|               |                | Reverse | 5'-TGGTACCCGAAATGGTGAAT-3'  |     |
| <i>Actb</i>   | $\beta$ -actin | Forward | 5'-TCGCCATGGATGACGATA-3'    | 110 |
|               |                | Reverse | 5'-CACGATGGAGGGAATACAG-3'   |     |

42

43 S3.1. *Serca2* and *Serca3* expression

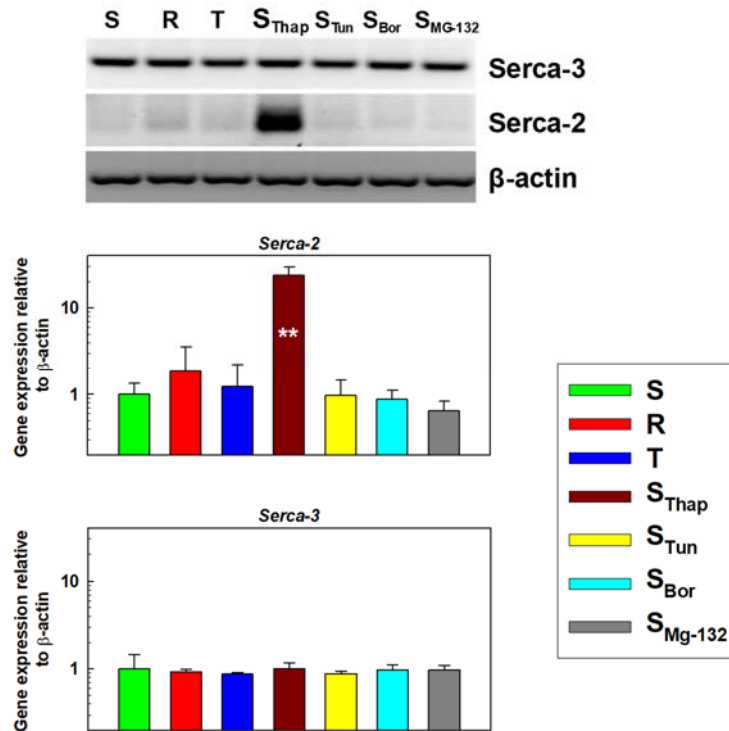

44

45 **Figure S3.** RT-PCR detection of *Serca2* and *Serca3* transcripts in variants of L1210 cells.  $\beta$ -Actin was  
 46 used as an internal control. Data are representative of three independent measurements. Quantities  
 47 of PCR products obtained by densitometry are expressed as the mean  $\pm$  S.E.M. of three independent  
 48 measurements of data relative to the  $\beta$ -actin signal. Only the value for *Serca2* in S<sub>Thap</sub> cells significantly  
 49 differed from that in S cells ( $p < 0.001$ ).

50

51 S4. Expression of cyclins A1, B1, D1 and E1 in variants of L1210 cells

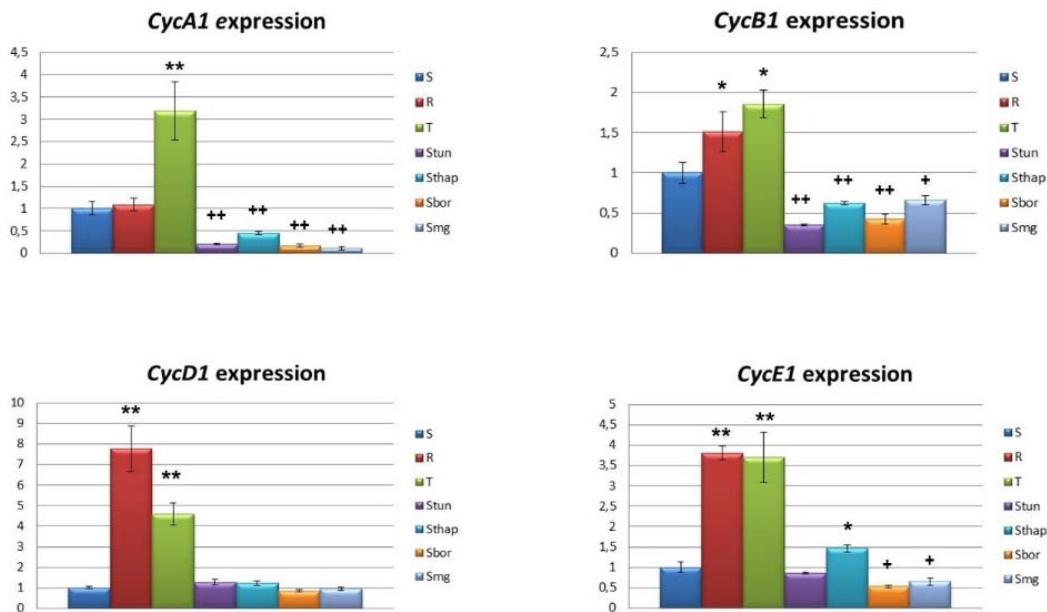

52

53 **Figure S4.** qRT-PCR quantification of *CycA1*, *CycB1*, *CycD1* and *CycE1* gene expression (using the  
 54 primers listed in Table 1) in S, R, T, STun, SThap, SBor and SMG-132 cells. Transcript levels were normalized  
 55 to the  $\beta$ -actin housekeeping gene and are expressed as the mean  $\pm$  SD of three independent  
 56 measurements. Significance: Data are higher than those in S cells at \*  $p < 0.02$ , \*\*  $p < 0.005$ ; Data are lower  
 57 than those in S cells at +  $p < 0.05$ , ++  $p < 0.01$ .

58 S5. Correlation between *Abcb1* and *Cyp2j6* or *Abcc1* and *Gstp1* gene expression.

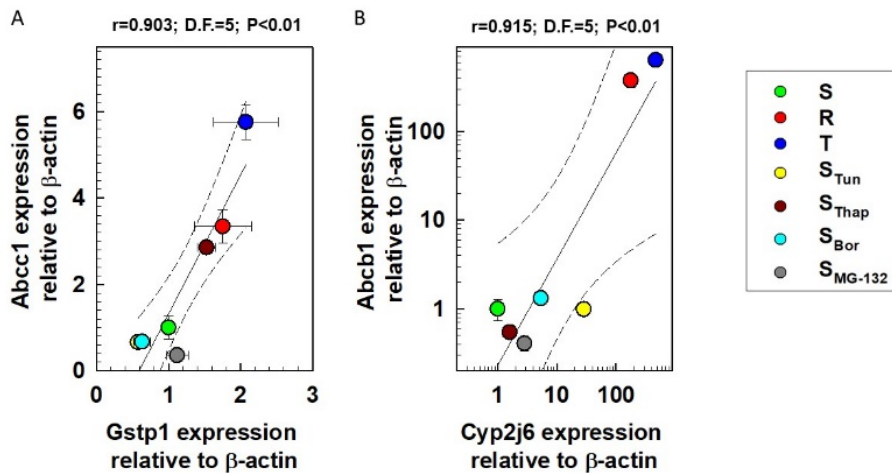

59

60 **Figure S5.** Correlation of *Abcc1* and *Gstp1* or *Abcb1* and *Cyp2j6* gene expression. Solid line: regression  
 61 line; dashed line: 99% confidence interval.
